# Supplementary material for: A Pd complex of a tridentate pincer CNC bis-carbene ligand as a robust homogenous Heck catalyst
Source: Royal Society of Chemistry journal article supplement (doi:10.1039/b008038l), 2001-01-01
Supplement: b008038l.doc [file b008038l.doc]

A Pd complex of a tridentate pincer CNC bis-carbene ligand as a robust homogenous Heck catalyst

Eduardo Peris,*a Jennifer A. Loch,b José Mata,a and Robert H. Crabtree*b

aDpto. de Química Inorgánica y Orgánica, Universitat Jaume I,

12080 Castellón, SPAIN. eperis@vents.uji.es

bDepartment of Chemistry, Yale University, P.O. Box 208107, New Haven, CT 06520-8107, USA. [robert.crabtree@yale.edu](mailto:robert.crabtree@yale.edu)

**Supplementary data**

*Improved synthesis of* **1**. A mixture of 2,6-dibromopyridine (2 g, 8.4 mmol) and 1-methylimidazole (1.4 g, 16.8 mmol) was heated under N­2 in a Schlenk tube at 150 °C in the absence of solvent for 3 h to give an off-white solid. This was cooled to room temperature, washed with CH2Cl2, and filtered (95% yield). The spectroscopic data agree with those previously reported.1

*Synthesis of* **2**. A mixture of Pd(AcO)2 (500 mg, 2.23 mmol) and **1** (900 mg, 2.25 mmol) was stirred in degassed DMSO (5 mL) at room temperature under N2 for 3 h, then heated at 50 °C for 12 h, and then at 160 °C for 1 h, yielding a pale yellow precipitate. The mixture was cooled to room temperature and the pale yellow solid was filtered and washed with acetonitrile and CH2Cl2 (70% yield). 1H NMR (300 MHz, d6-DMSO): ** 8.37 (t, 1H, 3*J*H–H = 8.4 Hz, pyr); 8.26 (d, 2H, 3*J*H–H = 2.1 Hz, imid); 7.93 (d, 2H, 3*J*H–H = 8.4 Hz, pyr); 7.67 (d, 2H, 3*J*H–H = 2.1 Hz, imid); 3.84 (s, 6H, CH3). 13C NMR (300 MHz, d6-DMSO): **38.9 (CH3), 109.5 (pyridyl C), 118.7, 126.2 (NCCN), 147.2, 150.7 (pyridyl C), 166.6 (NCN). The product can be recrystallized from DMSO/CH2Cl2.

# References

1. J. C. C. Chen and I. J. B. Lin, *J. Chem. Soc., Dalton Trans.,* 2000, 839.
